# Supplementary material for: A simple reagent-less approach using electrical discharge as a substitution for chelating agent in addressing genomic assay inhibition by divalent cations
Source: Royal Society of Chemistry journal article supplement (doi:10.1039/d0an01666g), 2020-01-01
Supplement: d0an01666g1.pdf [file d0an01666g1.pdf]

*Supporting Information*

**A simple reagent-less approach using electrical discharge as a substitution for  
chelating agent in addressing DNA hybridization based genomic assay inhibition  
by divalent cations**

*<sup>1</sup>Hyowon Jin, <sup>2</sup>Yeomin Yoon, <sup>3</sup>Mark R. Liles, <sup>4,\*</sup>Beelee Chua, and <sup>1,\*\*</sup>Ahjeong Son*

<sup>1</sup>Department of Environmental Science and Engineering, Ewha Womans University, Seoul 03760,  
Republic of Korea

<sup>2</sup>Department of Civil and Environmental Engineering, University of South Carolina, Columbia, SC  
29208, USA

<sup>3</sup>Department of Life Science, Auburn University, Auburn, AL 36849, USA

<sup>4</sup>School of Electrical Engineering, Korea University, Seoul 02841, Republic of Korea

\*Corresponding Author (B. Chua): 145 Anam-ro, Seongbuk-gu, Korea University, Seoul 02841,  
Republic of Korea; E-mail. [bchua@korea.ac.kr](mailto:bchua@korea.ac.kr), [chuabeelee@gmail.com](mailto:chuabeelee@gmail.com); Phone. +82 (2) 3290-4639

\*\*Corresponding Author (A. Son): 52 Ewhayeodae-gil, Seodaemun-gu, Ewha Womans University,  
Seoul 03760, Republic of Korea; E-mail. [ason@ewha.ac.kr](mailto:ason@ewha.ac.kr), [ahjeong.son@gmail.com](mailto:ahjeong.son@gmail.com); Phone. +82 (2)  
3277-3339; Fax. +82 (2) 3277-3275



## 2. Electrical discharge setup

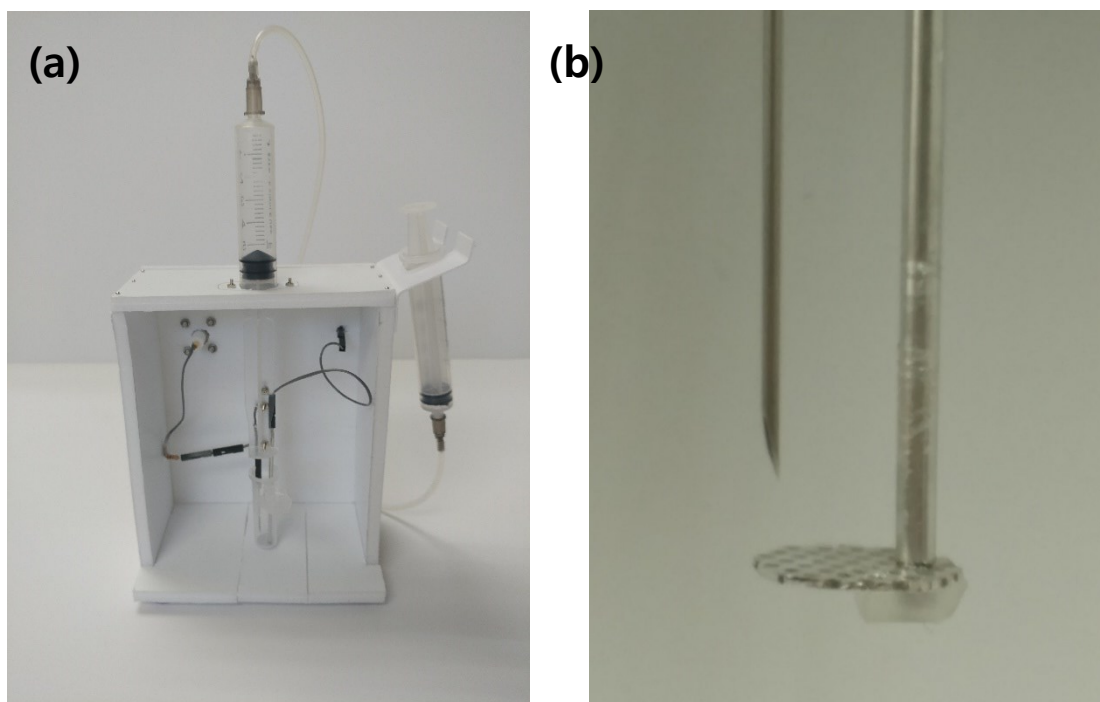

**Fig. S2.** Photos of the (a) experimental setup and (b) electrodes employed in the experiment.

### 3. Effect on pH as a result of electrical discharge treatment

**Method:** In order to monitor pH change as a result of electrical discharge treatment before DNA hybridization of the NanoGene assay, the pH of the hybridization buffer (DIG hyb buffer) was measured after 0, 2, and 4 min of electrical discharge treatment. For each duration, electrical discharge treatment was performed on multiple buffer volumes of 180  $\mu\text{L}$  to achieve a total volume of  $\sim 4$  mL. Once  $\sim 4$  mL of buffer has been accumulated (for each duration), its pH is measured by a pH meter (Orion, Thermo Fisher Scientific, MA, USA).

**Results and Discussion:** As shown in Fig S3, the pH change was negligible for 0, 2, and 4 min of electrical discharge. The pH difference after 0 min and 2 min treatments was not significant (t-test,  $P$  value = 0.1609  $\gg$  0.05). Similarly, the pH difference between after 0 min and 2 min treatments was also not significant (t-test,  $P$  value = 1.000  $\gg$  0.05). Therefore, this result indicated that pH change was not responsible for the mitigation of  $\text{Mg}^{2+}$ . Hence, the mitigation of  $\text{Mg}^{2+}$  could be more reasonably attributed to the presence of negative charge/charged entity as shown in Fig. 1.

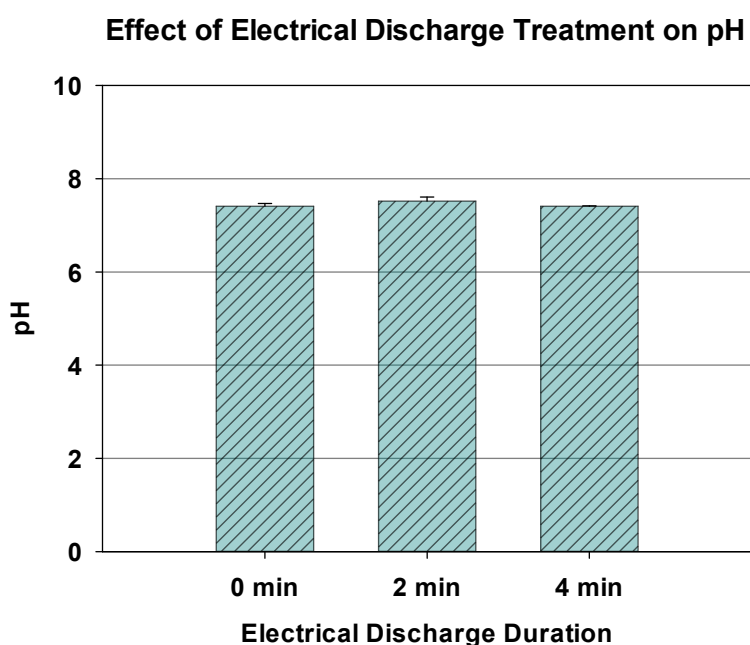

**Fig S3.** The pH change of DNA hybridization buffer during electrical discharge treatment. Mean and standard deviation were obtained from the triplicate samples.

**Table S1.** Comparison of proposed electrical discharge technique to the use of EDTA in the mitigation of  $Mg^{2+}$  ions in water sample.

|                             | <b>Electrical Discharge</b> | <b>EDTA</b>                                                |
|-----------------------------|-----------------------------|------------------------------------------------------------|
| <b>Type</b>                 | Electrical                  | Chemical                                                   |
| <b>Environmental Impact</b> | Negligible                  | Persistent and hazardous <sup>1,2</sup>                    |
| <b>Ecological Impact</b>    | Negligible                  | Negative impact on aquatic and soil ecology <sup>3,4</sup> |
| <b>Treatment Duration</b>   | 4 min                       | Few seconds                                                |
| <b>Cost</b>                 | Low                         | Low                                                        |
| <b>Replenishables</b>       | None                        | Yes                                                        |

**References.**

1. O. J. Grundler, A. T. M. van der Steen and J. Wilmont, Washington, DC, 2005.
2. WHO, Edetic acid (EDTA) in drinking water, World Health Organization: Geneva, 2003.
3. C. Schmidt and H.-J. Brauch, Environ. Toxicol., 2004, 19, 620-637.
4. G. P. Fitzgerald and S. L. Faust, Appl. Microbiol., 1993, 11, 345-351.
